# Supplementary material for: Simultaneous production of hydrogen with the degradation of organic pollutants using TiO2 photocatalyst modified with dual surface components
Source: Royal Society of Chemistry journal article supplement (doi:10.1039/c2ee21310a), 2012-01-01
Supplement: c2ee21310a.pdf [file c2ee21310a.pdf]

## Supplementary Information

### Simultaneous production of hydrogen with the degradation of organic pollutants using TiO<sub>2</sub> photocatalyst modified with dual surface components

Jungwon Kim, Damián Monllor-Satoca and Wonyong Choi\*

*School of Environmental Science and Engineering, Pohang University of Science and Technology (POSTECH), Pohang, 790-784, Korea*

*E-mail: wchoi@postech.edu*

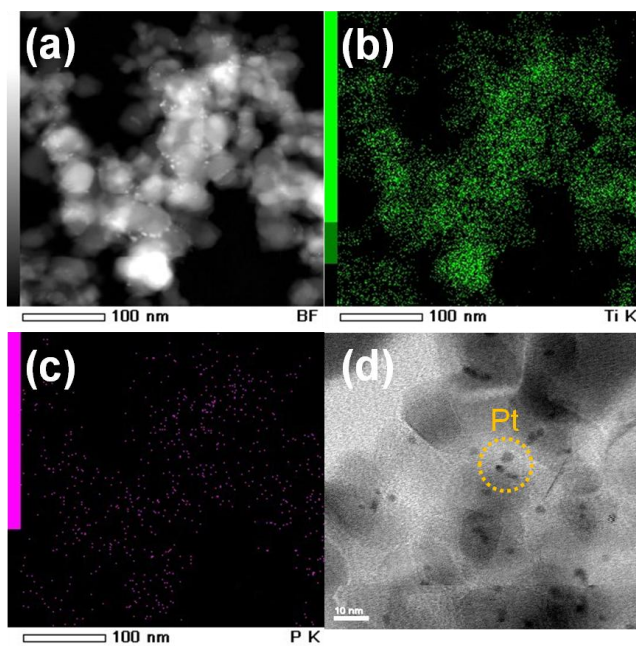

**Fig. S1** EDX and HRTEM images of P-TiO<sub>2</sub>/Pt sample (with 1wt% Pt and 30 mM H<sub>3</sub>PO<sub>4</sub>). (a) the scanning TEM bright field image; the elemental mapping of (b) Ti and (c) P, and (d) HRTEM image.

Supplementary Material (ESI) for Energy & Environmental Science  
This journal is © The Royal Society of Chemistry 2012

**Table S1** Surface adsorbed F<sup>-</sup> on TiO<sub>2</sub> (%) as a function of [NaF] and pH<sup>a</sup>

| pH | 1 mM                 | 2.5 mM               | 5 mM                 | 10 mM                |
|----|----------------------|----------------------|----------------------|----------------------|
| 3  | 87.6                 | 94.6                 | 97.2                 | 98.6                 |
| 6  | 5.9                  | 13.5                 | 23.8                 | 38.4                 |
| 9  | $2.1 \times 10^{-3}$ | $5.3 \times 10^{-3}$ | $1.1 \times 10^{-2}$ | $2.1 \times 10^{-2}$ |
| 11 | $3.2 \times 10^{-7}$ | $7.9 \times 10^{-7}$ | $1.6 \times 10^{-6}$ | $3.2 \times 10^{-6}$ |

<sup>a</sup> Calculations were done using the pK values from reference #28.

Supplementary Material (ESI) for Energy & Environmental Science  
 This journal is © The Royal Society of Chemistry 2012

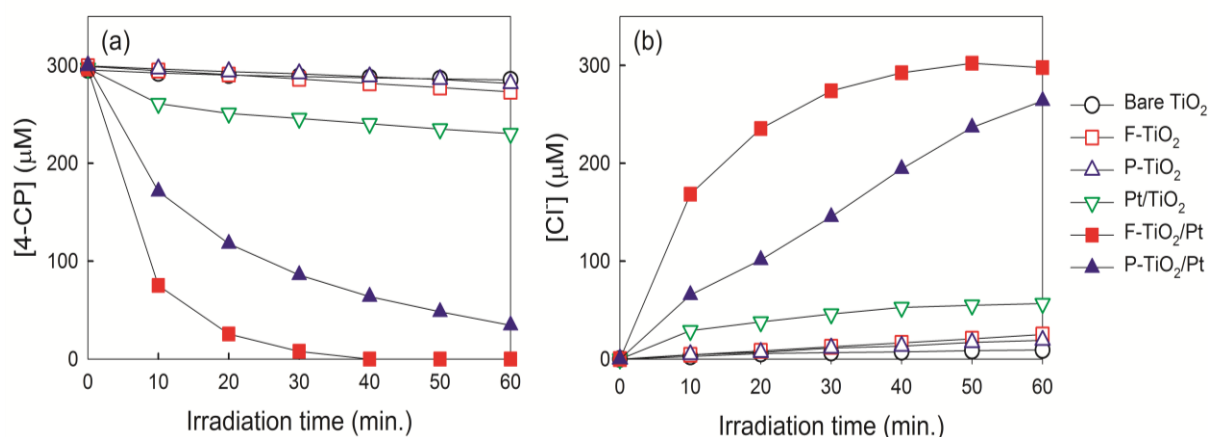

**Fig. S2** (a) Anoxic degradation of 4-CP and (b) the concurrent production of chloride in the suspension of bare TiO<sub>2</sub>, F-TiO<sub>2</sub>, P-TiO<sub>2</sub>, Pt/TiO<sub>2</sub>, F-TiO<sub>2</sub>/Pt, and P-TiO<sub>2</sub>/Pt. Experimental conditions: [catalyst] = 0.5 g L<sup>-1</sup>, [4-CP]<sub>0</sub> = 300 μM, [NaF] = 10 mM, pH<sub>i</sub> = 3.0, λ > 320 nm irradiation, and continuously Ar purged during irradiation.

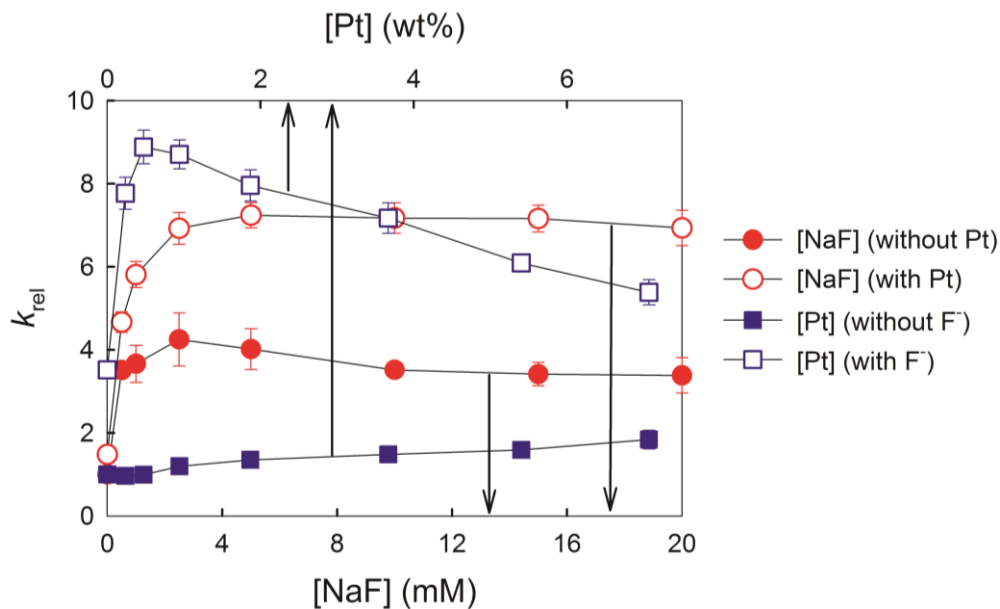

**Fig. S3** Relative activity ( $k_{rel}$ ) for the photocatalytic degradation of 4-CP in air-equilibrated condition depending on [NaF] (with 3.7wt% Pt/TiO<sub>2</sub>) and Pt loading (with NaF 10 mM). The relative activities are expressed as:  $k_{rel} = (\text{catalyst})_{activity}/(\text{bare TiO}_2)_{activity}$ . Experimental conditions: [catalyst] = 0.5 g L<sup>-1</sup>, [4-CP]<sub>0</sub> = 500 μM, pH<sub>i</sub> = 3.0, and λ > 320 nm irradiation.
